# Supplementary material
Source: PubMed Central journal article supplement (PMC4824005)

Figure 4a

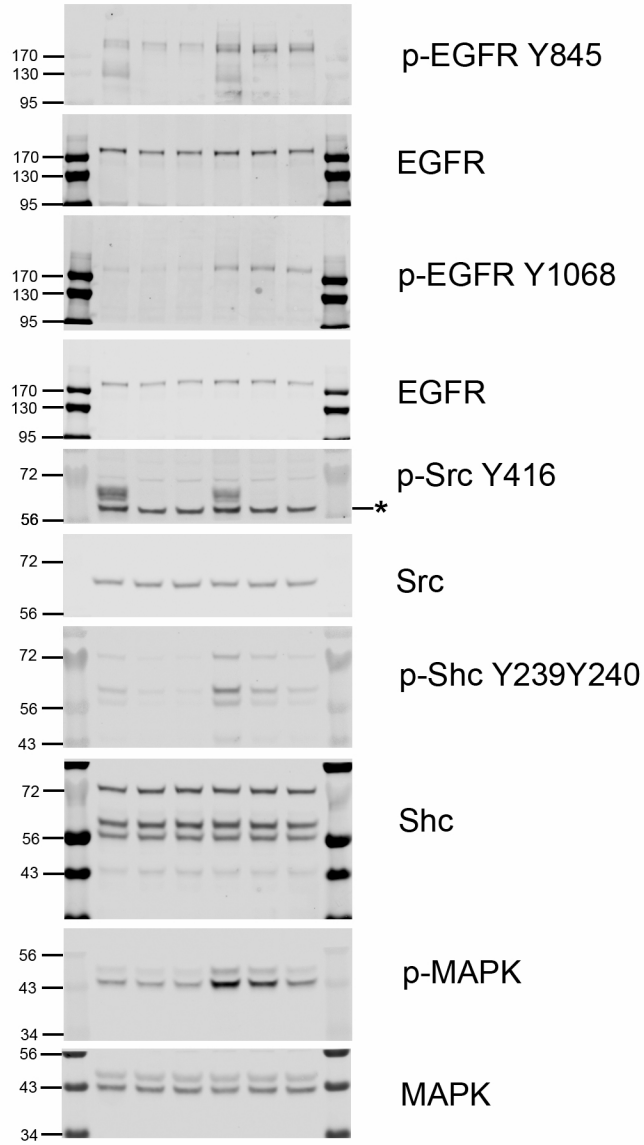

Figure 4b

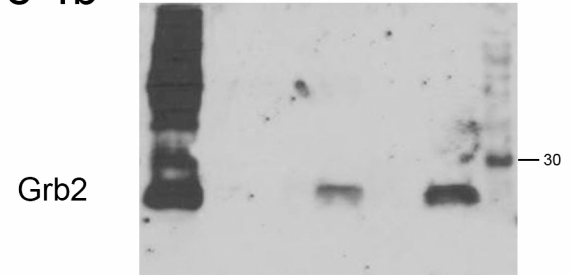

\*Non-specific band

Supplement: NIHMS764888-supplement-Supplementary_Data.pdf [file NIHMS764888-supplement-Supplementary_Data.pdf]
